# Supplementary material
Source: ML conference proceedings conference paper supplement (https://openreview.net/forum?id=Lwclw6u3Pcw)
Supplement: supplementary_material [file attachment]

---

# Characterizing and Measuring the Similarity of Neural Networks with Persistent Homology

## *Supplementary Material*

---

Anonymous Author(s)

Affiliation

Address

email

### 1 Appendix I

2 This Appendix contains mathematical definitions.

3 **Definition 1 (simplex)** A  $k$ -simplex is a  $k$ -dimensional polytope which is the convex hull of its  $k + 1$   
4 vertices. i.e. the set of all convex combinations  $\lambda_0 v_0 + \lambda_1 v_1 + \dots + \lambda_k v_k$  where  $\lambda_0 + \lambda_1 + \dots + \lambda_k = 1$   
5 and  $0 \leq \lambda_j \leq 1 \quad \forall j \in \{0, 1, \dots, k\}$ .

6 Some examples of simplices are:

- 7 • 0-simplex is a point.
- 8 • 1-simplex is a line segment.
- 9 • 2-simplex is a triangle.
- 10 • 3-simplex is a tetrahedron.

11 **Definition 2 (simplicial complex)** A simplicial complex  $\mathcal{K}$  is a set of simplices that satisfies the  
12 following conditions:

- 13 1. Every subset (or face) of a simplex in  $\mathcal{K}$  also belongs to  $\mathcal{K}$ .
- 14 2. For any two simplices  $\sigma_1$  and  $\sigma_2$  in  $\mathcal{K}$ , if  $\sigma_1 \cap \sigma_2 \neq \emptyset$ , then  $\sigma_1 \cap \sigma_2$  is a common subset, or  
15 face, of both  $\sigma_1$  and  $\sigma_2$ .

16 **Definition 3 (directed flag complex)** Let  $G = (V, E)$  be a directed graph. The directed flag complex  
17  $FC(G)$  is defined to be the ordered simplicial complex whose  $k$ -simplices are all ordered  $(k + 1)$ -  
18 cliques, i.e.,  $(k + 1)$ -tuples  $\sigma = (v_0, v_1, \dots, v_k)$ , such that  $v_i \in V \quad \forall i$ , and  $(v_i, v_j) \in E$  for  $i < j$ .

19 We define the boundary,  $\partial$ , as a function that maps  $i$ -simplex to the sum of its  $(i-1)$ -dimensional faces.  
20 Formally speaking, for an  $i$ -simplex  $\sigma = [v_0, \dots, v_i]$ , its boundary ( $\partial$ ) is:

$$\partial_i \sigma = \sum_{j=0}^i [v_0, \dots, \hat{v}_j, \dots, v_i] \quad (1)$$

21 where the hat indicates the  $v_j$  is omitted.

22 We can expand this definition to  $i$ -chains. For an  $i$ -chain  $c = c_i \sigma_i$ ,  $\partial_i(c) = \sum_i c_i \partial_i \sigma_i$ .

23 We can now distinguish two special types of chains using the boundary map that will be useful to  
24 define homology:

- The first one is an  $i$ -cycle, which is defined as an  $i$ -chain with empty boundary. In other words, an  $i$ -chain  $c$  is an  $i$ -cycle if and only if  $\partial_i(c) = 0$ , i.e.  $c \in \text{Ker}(\partial_i)$ .
- An  $i$ -chain  $c$  is  $i$ -boundary if there exists an  $(i+1)$ -chain  $d$  such that  $c = \partial_{i+1}(d)$ , i.e.  $c \in \text{Im}(\partial_{i+1})$ .

**Definition 4 (graph)** A graph  $G$  is a pair  $(V, E)$ , where  $V$  is a finite set referred to as the vertices or nodes of  $G$ , and  $E$  is a subset of the set of unordered pairs  $e = \{u, v\}$  of distinct points in  $V$ , which we call the edges of  $G$ . Geometrically the pair  $\{u, v\}$  indicates that the vertices  $u$  and  $v$  are adjacent in  $G$ . A directed graph, or a digraph, is similarly a pair  $(V, E)$  of vertices  $V$  and edges  $E$ , except the edges are ordered pairs of distinct vertices, i.e., the pair  $(u, v)$  indicates that there is an edge from  $u$  to  $v$  in  $G$ . In a digraph, we allow reciprocal edges, i.e., both  $(u, v)$  and  $(v, u)$  may be edges in  $G$ , but we exclude loops, i.e., edges of the form  $(v, v)$ .

**Definition 5 (homology group)** Given these two special subspaces,  $i$ -cycles  $Z_i(K)$  and  $i$ -boundaries  $B_i(K)$  of  $C_i(K)$ , we now take the quotient space of  $B_i(K)$  as a subset of  $Z_i(K)$ . In this quotient space, there are only the  $i$ -cycles that do not bound an  $(i+1)$ -complex, or  $i$ -voids of  $K$ . This quotient space is called  $i$ -th homology group of the simplicial complex  $K$ :

$$H_i(K) = \frac{Z_i(K)}{B_i(K)} = \frac{\text{Ker}(\partial_i)}{\text{Im}(\partial_{i+1})} \quad (2)$$

where  $\text{Ker}$  and  $\text{Im}$  are the function kernel and image respectively.

The dimension of  $i$ -th homology is called the  $i$ -th Betti number of  $K$ ,  $\beta_i(K)$ , where:

$$\beta_i(K) = \dim(\text{Ker}(\partial_i)) - \dim(\text{Im}(\partial_{i+1})) \quad (3)$$

**Definition 6 (Wasserstein distance)** The  $p$ -Wasserstein distance between two PDs  $D_1$  and  $D_2$  is the infimum over all bijections:  $\gamma: D_1 \rightarrow D_2$  of:

$$d_W(D_1, D_2) = \left( \sum_{x \in D_1} \|x - \gamma(x)\|_\infty^p \right)^{1/p} \quad (4)$$

where  $\| \cdot \|_\infty$  is defined for  $(x, y) \in \mathbb{R}^2$  by  $\max\{|x|, |y|\}$ . The limit  $p \rightarrow \infty$  defines the Bottleneck distance. More explicitly, it is the infimum over the same set of bijections of the value

$$d_B(D_1, D_2) = \sup_{x \in D_1} \|x - \gamma(x)\|_\infty. \quad (5)$$

**Definition 7 (Persistence landscape)** Given a collection of intervals  $\{(b_i, d_i)\}_{i \in I}$  that compose a PD, its persistence landscape is the set of functions  $\lambda_k: \mathbb{R} \rightarrow \mathbb{R}$  defined by letting  $\lambda_k(t)$  be the  $k$ -th largest value of the set  $\{\Lambda_i(t)\}_{i \in I}$  where:

$$\Lambda_i(t) = [\min\{t - b_i, d_i - t\}]_+ \quad (6)$$

and  $c_+ := \max(c, 0)$ . The function  $\lambda_k$  is referred to as the  $k$ -layer of the persistence landscape.

Now we define a vectorization of the set of real-valued function that compose PDs on  $\mathbb{N} \times \mathbb{R}$ . For any  $p = 1, \dots, \infty$  we can restrict attention to PDs  $D$  whose associated persistence landscape  $\lambda$  is  $p$ -integrable, that is to say,

$$\|\lambda\|_p = \left( \sum_{i \in \mathbb{N}} \|\lambda_i\|_p^p \right)^{1/p} \quad (7)$$

is finite. In this case, we refer to Equation (7) as the  $p$ -landscape norm of  $D$ . For  $p = 2$ , we define the value of the landscape kernel or similarity of two vectorized PDs  $D$  and  $E$  as

$$\langle \lambda, \mu \rangle = \left( \sum_{i \in \mathbb{N}} \int_{\mathbb{R}} |\lambda_i(x) - \mu_i(x)|^2 dx \right)^{1/2} \quad (8)$$

where  $\lambda$  and  $\mu$  are their associated persistence landscapes.

$\lambda_k$  is geometrically described as follows. For each  $i \in I$ , we draw an isosceles triangle with base the interval  $(b_i, d_i)$  on the horizontal  $t$ -axis, and sides with slope 1 and  $-1$ . This subdivides the plane into a number of polygonal regions that we label by the number of triangles contained on it. If  $P_k$  is the union of the polygonal regions with values at least  $k$ , then the graph of  $\lambda_k$  is the upper contour of  $P_k$ , with  $\lambda_k(a) = 0$  if the vertical line  $t = a$  does not intersect  $P_k$ .

**Definition 8 (Weighted silhouette)** Let  $D = \{(b_i, d_i)\}_{i \in I}$  be a PD and  $w = \{w_i\}_{i \in I}$  a set of positive real numbers. The silhouette of  $D$  weighted by  $w$  is the function  $\phi : \mathbb{R} \rightarrow \mathbb{R}$  defined by:

$$\phi(t) = \frac{\sum_{i \in I} w_i \Lambda_i(t)}{\sum_{i \in I} w_i}, \quad (9)$$

where

$$\Lambda_i(t) = [\min\{t - b_i, d_i - t\}]_+ \quad (10)$$

and  $c_+ := \max(c, 0)$ . When  $w_i = |d_i - b_i|^p$  for  $0 < p \leq \infty$  we refer to  $\phi$  as the  $p$ -power-weighted silhouette of  $D$ . It defines a vectorization of the set of PDs on the vector space of continuous real-valued functions on  $\mathbb{R}$ .

**Definition 9 (Heat vectorizations)** Considering PD as the support of Dirac deltas, one can construct, for any  $t > 0$ , two vectorizations of the set of PDs to the set of continuous real-valued function on the first quadrant  $\mathbb{R}_{\geq 0}^2$ . The heat vectorization is constructed for every PD  $D$  by solving the heat equation:

$$\begin{aligned} \Delta_x(u) &= \partial_t u && \text{on } \Omega \times \mathbb{R}_{>0} \\ u &= 0 && \text{on } \{x_1 = x_2\} \times \mathbb{R}_{\geq 0} \\ u &= \sum_{p \in D} \delta_p && \text{on } \Omega \times 0 \end{aligned} \quad (11)$$

where  $\Omega = \{(x_1, x_2) \in \mathbb{R}^2 \mid x_1 \leq x_2\}$ , then solving the same equation after precomposing the data of Equation (11) with the change of coordinates  $(x_1, x_2) \mapsto (x_2, x_1)$ , and defining the image of  $D$  to be the difference between these two solutions at the chosen time  $t$ .

We recall that the solution to the heat equation with initial condition given by a Dirac delta supported at  $p \in \mathbb{R}^2$  is:

$$\frac{1}{4\pi t} \exp\left(-\frac{\|p - x\|^2}{4t}\right) \quad (12)$$

To highlight the connection with normally distributed random variables, it is customary to use the change of variable  $\sigma = \sqrt{2t}$ .

For a complete reference on vectorized persistence summaries and PH approximated metrics, see Tauzin et al. [2], Berry et al. [1] and Giotto-TDA package documentation appendix<sup>1</sup>.

Figure 1 shows a neural network filtration example. Note that most of the edges have been omitted for clarity and, for the same reason,  $\varepsilon$  evolution has been discretized.

<sup>1</sup><https://giotto-ai.github.io/gtda-docs/0.3.1/theory/glossary.html#persistence-landscape>

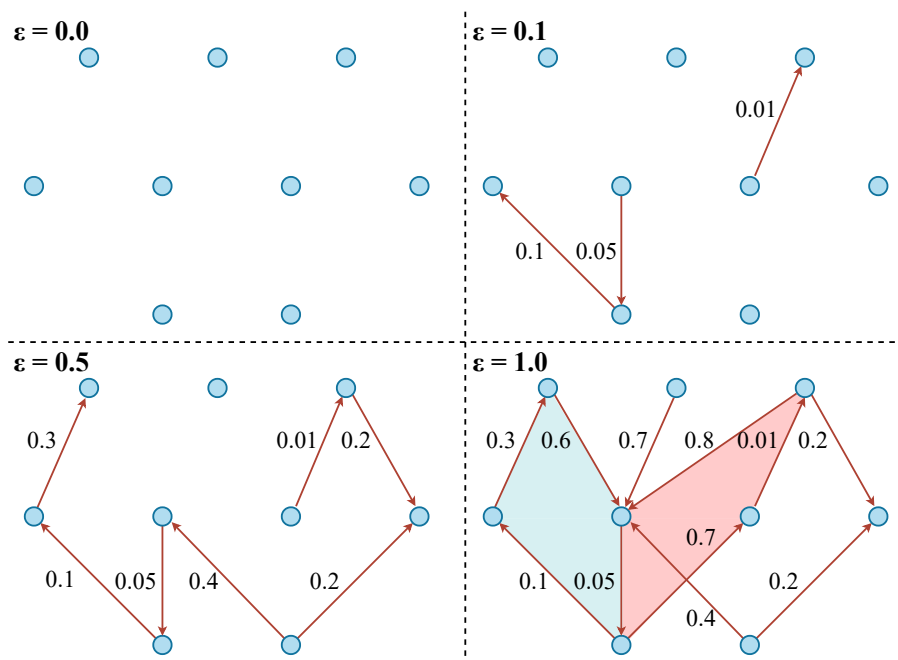

Figure 1: MLP Simplicial complex filtration example.

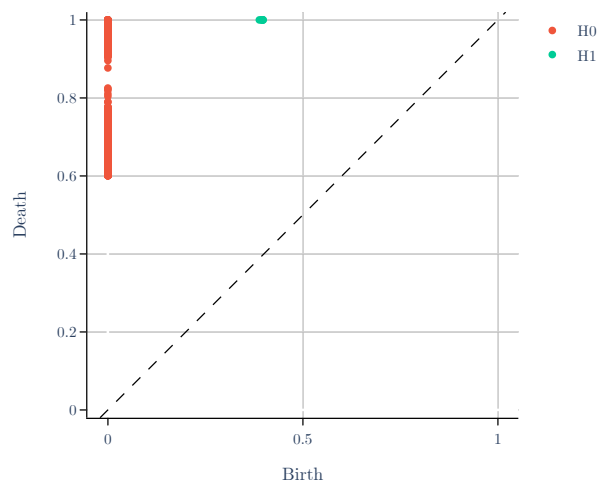

Figure 2: A Persistence Homology diagram.

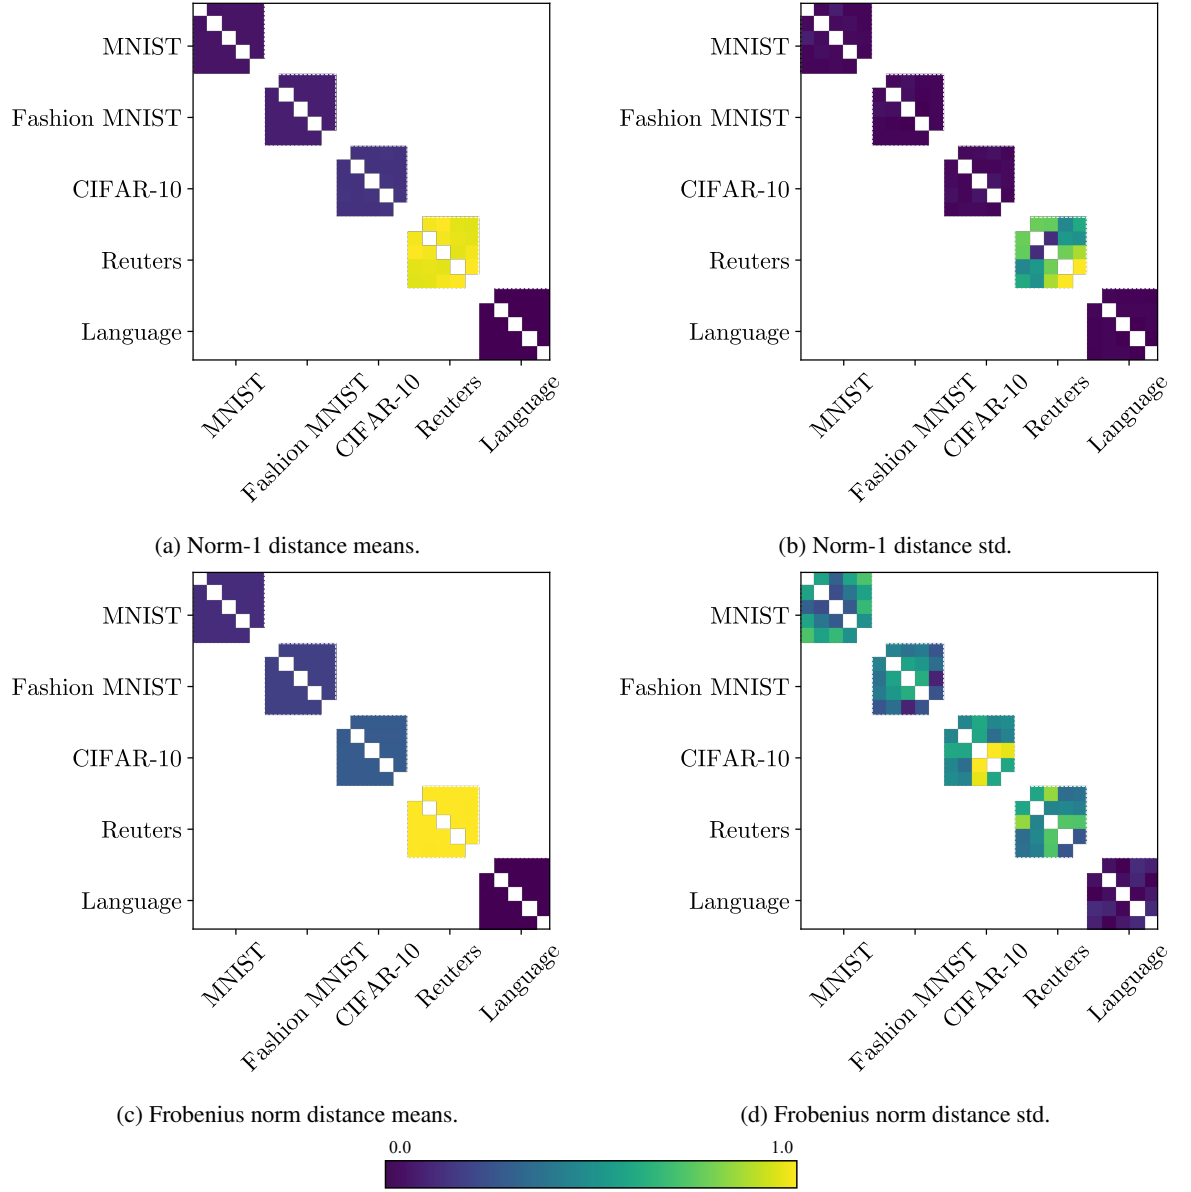Figure 3: Norm distances among control experiments. 5 runs  $\times$  5 randomizations.

| Norm      | Minimum | Maximum | Mean   | Standard deviation |
|-----------|---------|---------|--------|--------------------|
| 1-Norm    | 0.6683  | 4.9159  | 1.9733 | 1.5693             |
| Frobenius | 0.0670  | 0.9886  | 0.4514 | 0.3074             |

Table 1: Normalized difference comparison of self-norm against the maximum mean distance of the experiment.

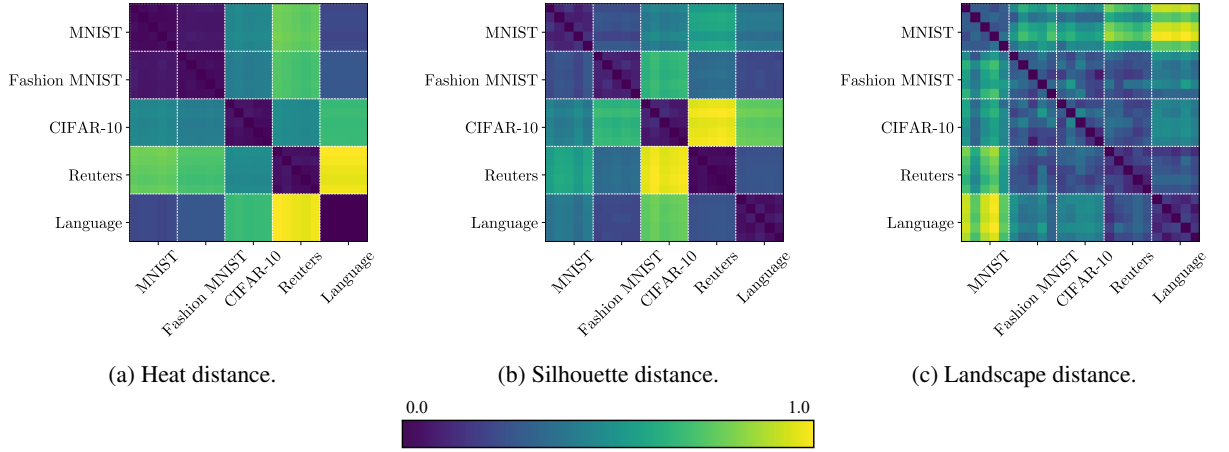

Figure 4: Topological distance means of control experiments.

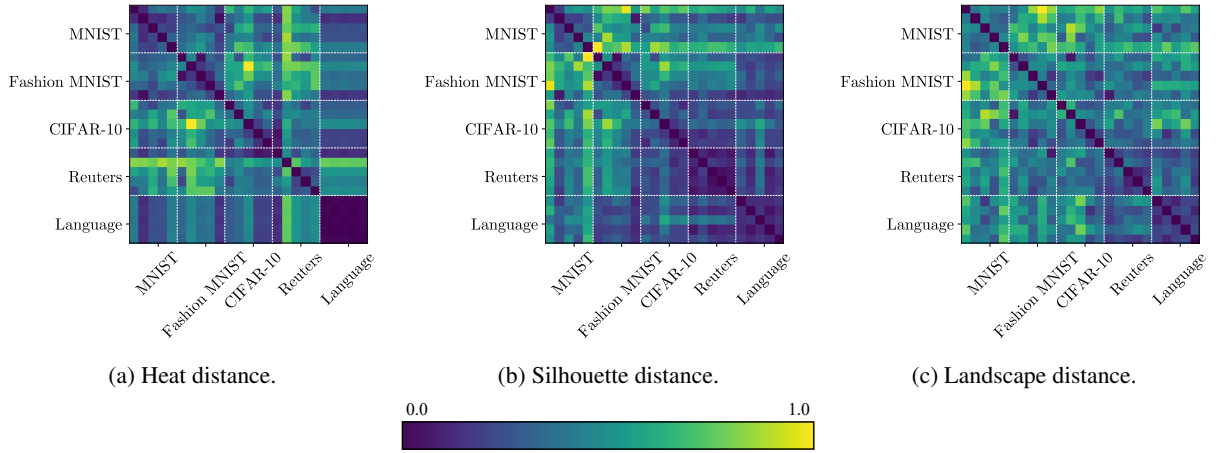

Figure 5: Topological distance standard deviations of control experiments.

### 83 Appendix III

84 This Appendix contains statistics about experiment groups by dataset.

| Experiment group | Experiment       | Value                        | Index |
|------------------|------------------|------------------------------|-------|
| 1                | Layer size       | 128                          | 1     |
|                  |                  | 256                          | 2     |
|                  |                  | 512                          | 3     |
|                  |                  | 1024                         | 4     |
| 2                | Number of layers | 2                            | 5     |
|                  |                  | 4                            | 6     |
|                  |                  | 6                            | 7     |
|                  |                  | 8                            | 8     |
|                  |                  | 10                           | 9     |
| 3                | Input order      | NA                           | 10-14 |
| 4                | Number of labels | 2                            | 15    |
|                  |                  | 4 (M, FM, C), 6 (R), 3 (L)   | 16    |
|                  |                  | 6 (M, FM, C), 12 (R), 4 (L)  | 17    |
|                  |                  | 8 (M, FM, C), 23 (R), 6 (L)  | 18    |
|                  |                  | 10 (M, FM, C), 46 (R), 7 (L) | 19    |

Table 2: Indices of the experiments of the distance matrices. M is for MNIST, FM for Fashion MNIST, C for CIFAR-10, R for Reuters and L for Language Identification.

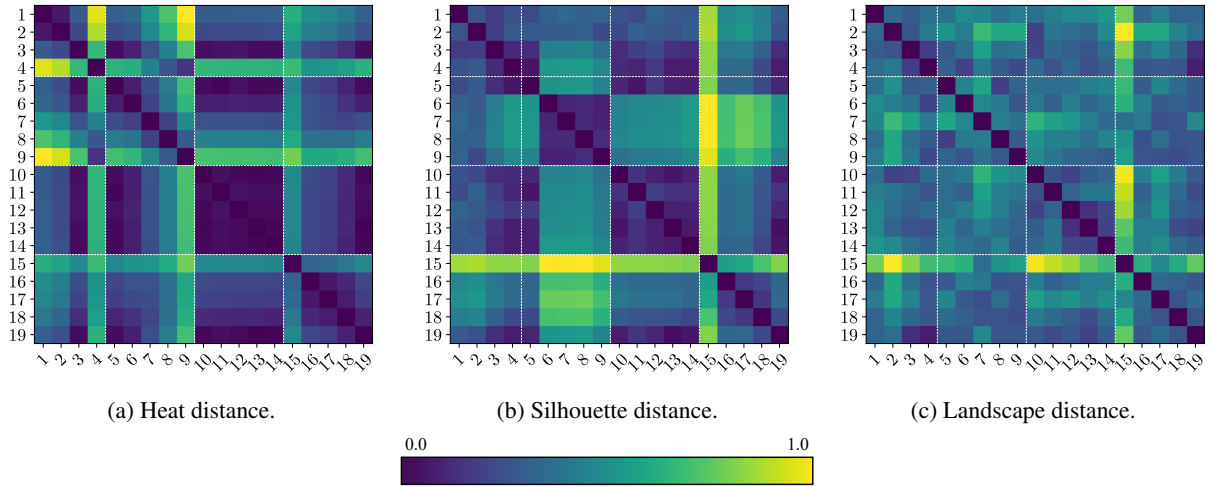

Figure 6: MNIST neural networks' Persistent Homology distance matrices means.

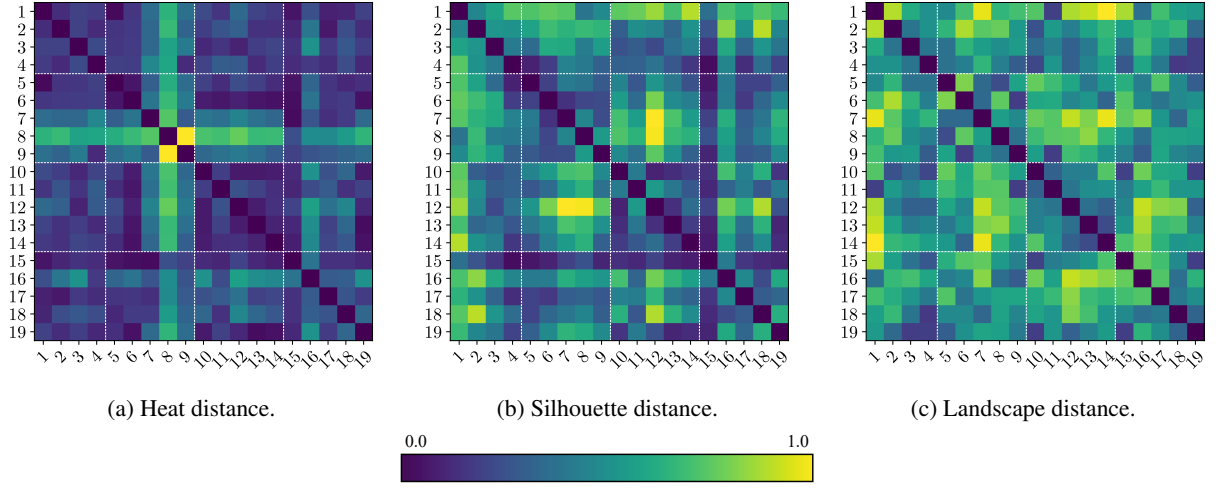

Figure 7: MNIST neural networks' Persistent Homology distance matrices standard deviations.

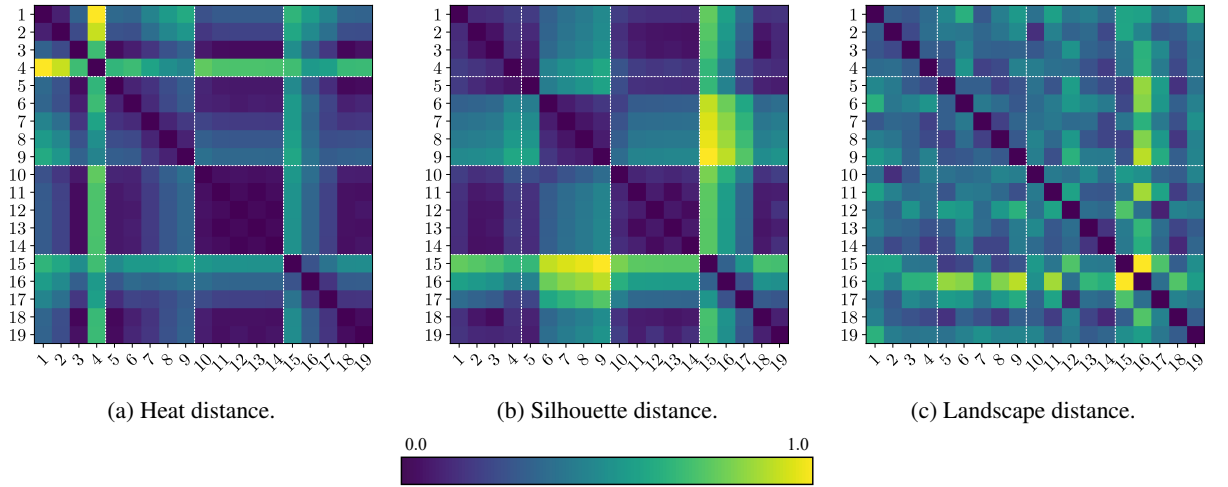

Figure 8: Fashion MNIST neural networks' Persistent Homology distance matrices means.

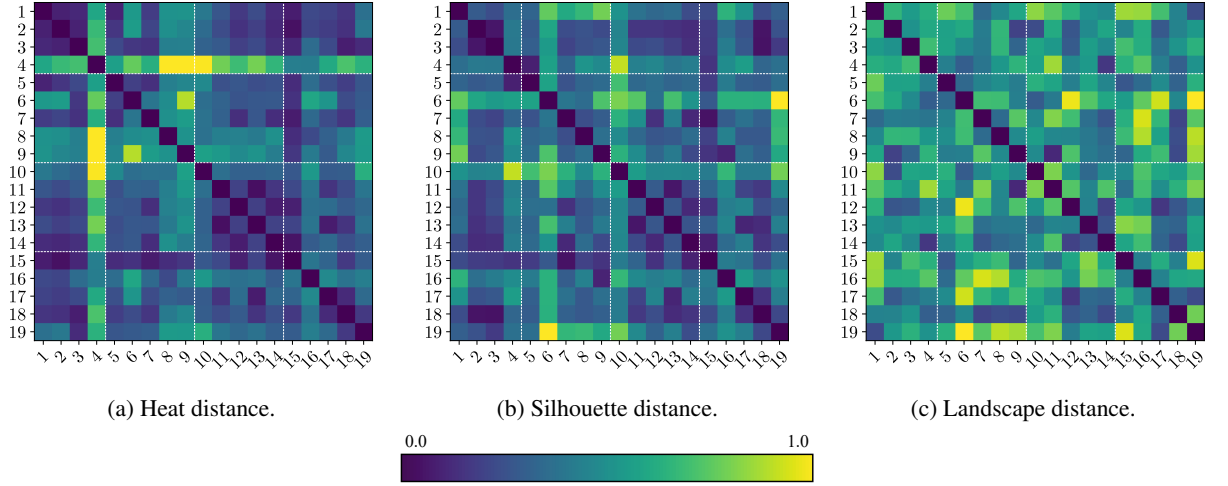

Figure 9: Fashion MNIST neural networks' Persistent Homology distance matrices standard deviations.

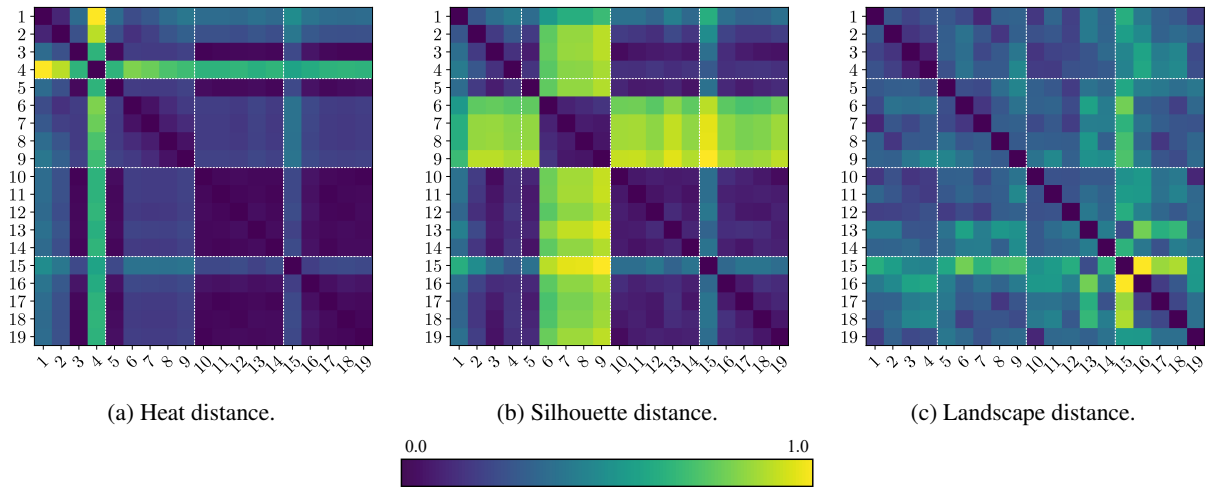

Figure 10: CIFAR-10 neural networks' Persistent Homology distance matrices means.

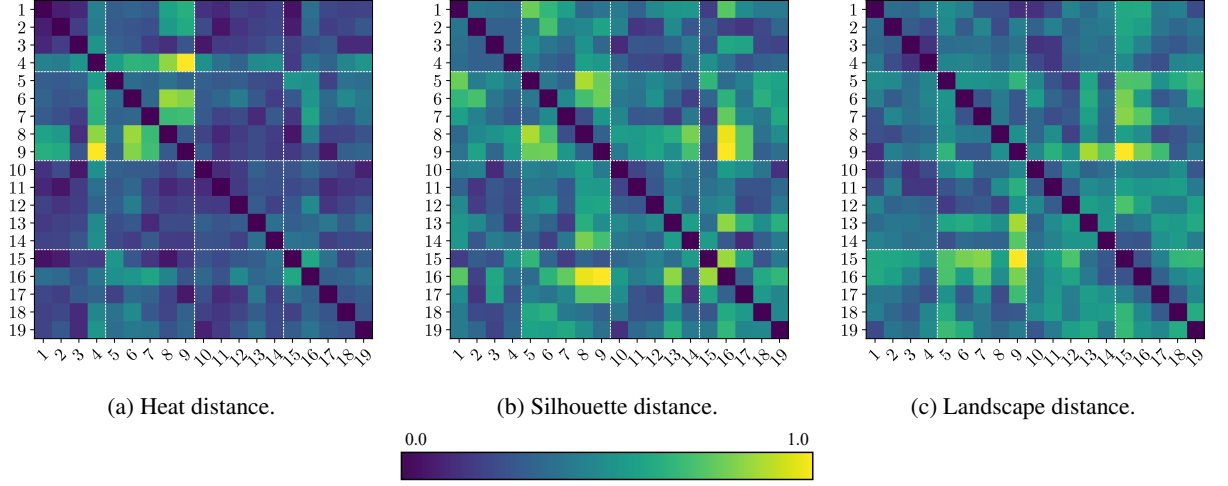

Figure 11: CIFAR-10 neural networks' Persistent Homology distance matrices standard deviations.

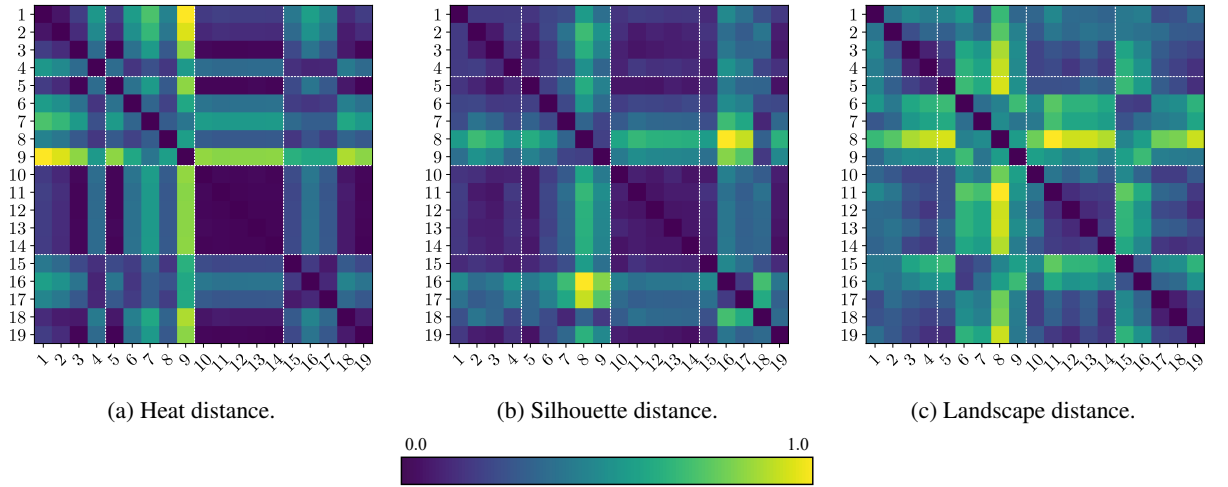

Figure 12: Language Identification neural networks' Persistent Homology distance matrices means.

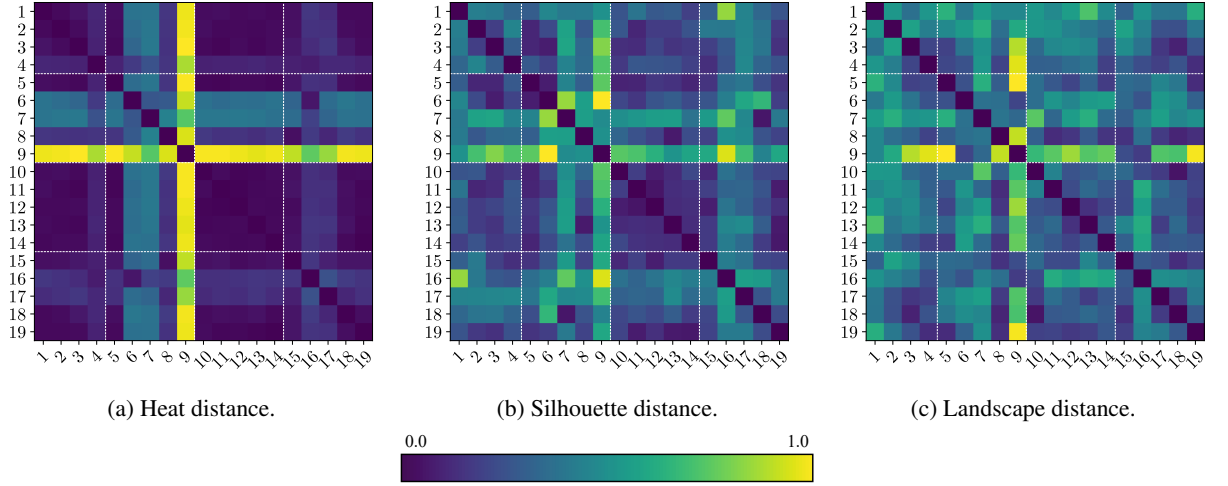

Figure 13: Language Identification neural networks' Persistent Homology distance matrices standard deviations.

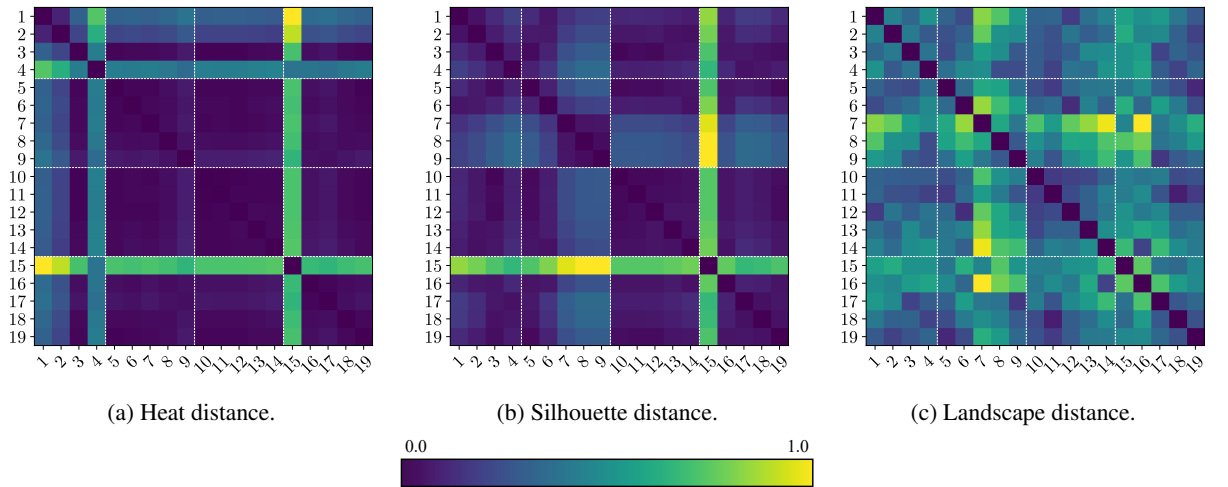

Figure 14: Reuters neural networks' Persistent Homology distance matrices means.

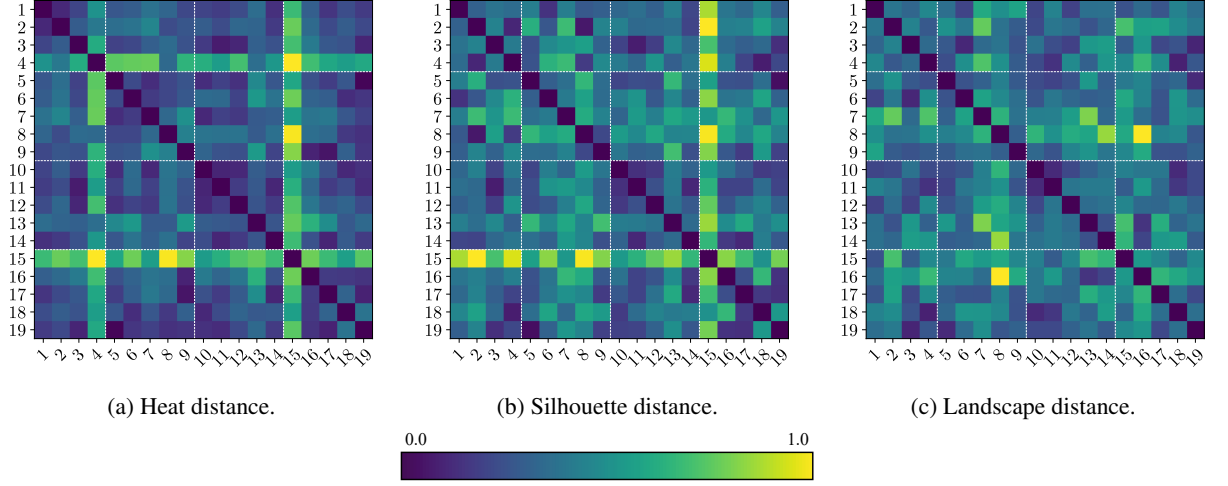

Figure 15: Reuters neural networks' Persistent Homology distance matrices standard deviations.

| Discretization | Experiment    | Mean   | Standard deviation |
|----------------|---------------|--------|--------------------|
| Heat           | Layer size    | 0.5128 | 0.3391             |
| Heat           | Number layers | 0.3633 | 0.1933             |
| Heat           | Input order   | 0.0291 | 0.0100             |
| Heat           | Number labels | 0.2279 | 0.1352             |
| Landscape      | Layer size    | 0.3077 | 0.0727             |
| Landscape      | Number layers | 0.3776 | 0.1096             |
| Landscape      | Input order   | 0.2719 | 0.0822             |
| Landscape      | Number labels | 0.4266 | 0.1705             |
| Silhouette     | Layer size    | 0.2110 | 0.0552             |
| Silhouette     | Number layers | 0.2681 | 0.1953             |
| Silhouette     | Input order   | 0.1115 | 0.0364             |
| Silhouette     | Number labels | 0.4126 | 0.2270             |

Table 3: MNIST statistics of experiment groups.

| Discretization | Experiment    | Mean   | Standard deviation |
|----------------|---------------|--------|--------------------|
| Heat           | Layer size    | 0.5380 | 0.3487             |
| Heat           | Number layers | 0.1774 | 0.0739             |
| Heat           | Input order   | 0.0308 | 0.0132             |
| Heat           | Number labels | 0.2679 | 0.1427             |
| Landscape      | Layer size    | 0.2976 | 0.0482             |
| Landscape      | Number layers | 0.2886 | 0.0631             |
| Landscape      | Input order   | 0.3583 | 0.1114             |
| Landscape      | Number labels | 0.5301 | 0.2149             |
| Silhouette     | Layer size    | 0.1265 | 0.0409             |
| Silhouette     | Number layers | 0.2592 | 0.2024             |
| Silhouette     | Input order   | 0.0824 | 0.0353             |
| Silhouette     | Number labels | 0.4150 | 0.1940             |

Table 4: Fashion MNIST statistics of experiment groups.

| Discretization | Experiment    | Mean   | Standard deviation |
|----------------|---------------|--------|--------------------|
| Heat           | Layer size    | 0.5414 | 0.3319             |
| Heat           | Number layers | 0.1314 | 0.0529             |
| Heat           | Input order   | 0.0243 | 0.0068             |
| Heat           | Number labels | 0.1084 | 0.0870             |
| Landscape      | Layer size    | 0.1907 | 0.0630             |
| Landscape      | Number layers | 0.2967 | 0.0789             |
| Landscape      | Input order   | 0.3119 | 0.0584             |
| Landscape      | Number labels | 0.5193 | 0.2803             |
| Silhouette     | Layer size    | 0.2705 | 0.0964             |
| Silhouette     | Number layers | 0.3885 | 0.3626             |
| Silhouette     | Input order   | 0.0769 | 0.0204             |
| Silhouette     | Number labels | 0.2049 | 0.1341             |

Table 5: CIFAR-10 statistics of experiment groups.

| Discretization | Experiment    | Mean   | Standard deviation |
|----------------|---------------|--------|--------------------|
| Heat           | Layer size    | 0.2856 | 0.1771             |
| Heat           | Number layers | 0.4396 | 0.1811             |
| Heat           | Input order   | 0.0159 | 0.0040             |
| Heat           | Number labels | 0.2374 | 0.1243             |
| Landscape      | Layer size    | 0.3246 | 0.1254             |
| Landscape      | Number layers | 0.5643 | 0.1643             |
| Landscape      | Input order   | 0.2320 | 0.0982             |
| Landscape      | Number labels | 0.3519 | 0.1671             |
| Silhouette     | Layer size    | 0.1501 | 0.0384             |
| Silhouette     | Number layers | 0.3374 | 0.1420             |
| Silhouette     | Input order   | 0.0699 | 0.0159             |
| Silhouette     | Number labels | 0.3737 | 0.1719             |

Table 6: Language Identification statistics of experiment groups.

| Discretization | Experiment    | Mean   | Standard deviation |
|----------------|---------------|--------|--------------------|
| Heat           | Layer size    | 0.4004 | 0.2220             |
| Heat           | Number layers | 0.0412 | 0.0211             |
| Heat           | Input order   | 0.0166 | 0.0051             |
| Heat           | Number labels | 0.2927 | 0.3185             |
| Landscape      | Layer size    | 0.3950 | 0.0733             |
| Landscape      | Number layers | 0.5265 | 0.1678             |
| Landscape      | Input order   | 0.3060 | 0.1028             |
| Landscape      | Number labels | 0.4534 | 0.1651             |
| Silhouette     | Layer size    | 0.1104 | 0.0470             |
| Silhouette     | Number layers | 0.1596 | 0.0922             |
| Silhouette     | Input order   | 0.0387 | 0.0112             |
| Silhouette     | Number labels | 0.3206 | 0.3158             |

Table 7: Reuters statistics of experiment groups.

## 85 **References**

- 86 [1] E. Berry, Y.-C. Chen, J. Cisewski-Kehe, and B. T. Fasy. Functional summaries of persistence  
87 diagrams. *Journal of Applied and Computational Topology*, 4:211–262, 2020.
- 88 [2] G. Tauzin, U. Lupo, L. Tunstall, J. B. Pérez, M. Caorsi, A. Medina-Mardones, A. Dassatti, and  
89 K. Hess. giotto-tda: A topological data analysis toolkit for machine learning and data exploration,  
90 2020.
